# Supplementary material for: Application of the Two-Dimensional Entropy Measures in the Infrared Thermography-Based Detection of Rider: Horse Bodyweight Ratio in Horseback Riding
Source: MDPI journal article supplement (doi:10.3390/s22166052), 2022-08-13
Supplement: s1 [file s1]

# Application of the Two-Dimensional Entropy Measures in the Infrared Thermography-Based Detection of Rider:Horse Bodyweight Ratio in Horseback Riding

Małgorzata Domino <sup>1,\*</sup>, Marta Borowska <sup>2</sup>, Łukasz Zdrojkowski <sup>1</sup>, Tomasz Jasiński <sup>1</sup>, Urszula Sikorska <sup>3</sup>, Michał Skibniewski <sup>4</sup> and Małgorzata Maśko <sup>3,\*</sup>

<sup>1</sup> Department of Large Animal Diseases and Clinic, Institute of Veterinary Medicine, Warsaw University of Life Sciences, 02-787 Warsaw, Poland

<sup>2</sup> Institute of Biomedical Engineering, Faculty of Mechanical Engineering, Białystok University of Technology, 15-351 Białystok, Poland

<sup>3</sup> Department of Animal Breeding, Institute of Animal Science, Warsaw University of Life Sciences, 02-787 Warsaw, Poland

<sup>4</sup> Department of Morphological Sciences, Institute of Veterinary Medicine, Warsaw University of Life Sciences, 02-776 Warsaw, Poland

\* Correspondence: malgorzata\_domino@sggw.edu.pl (M.D.); malgorzata\_masko@sggw.edu.pl (M.M.)

**Table S1.** Details of horses and riders participating in the study. Riders represented the light (L), moderate (M), and heavy (H) riders groups.

| Rider groups | Sign | Horse |      |     | Sign | Horse |      |     | Sign | Rider |      |      |
|--------------|------|-------|------|-----|------|-------|------|-----|------|-------|------|------|
|              |      | BW    | High | SW  |      | BW    | High | SW  |      | BW    | High | BMI  |
| L            | 1    | 585   | 166  | 4.1 | 7    | 560   | 162  | 4.2 | A    | 58    | 159  | 22.9 |
|              | 2    | 550   | 154  | 4.5 | 8    | 545   | 157  | 4.2 | B    | 60    | 160  | 23.4 |
| M            | 3    | 580   | 158  | 4.2 | 9    | 570   | 158  | 4.4 | C    | 77    | 172  | 26.0 |
|              | 4    | 575   | 164  | 4.5 | 10   | 580   | 162  | 4.4 | D    | 75    | 164  | 27.9 |
| H            | 5    | 560   | 160  | 4.1 | 11   | 565   | 160  | 4.2 | E    | 91    | 172  | 30.8 |
|              | 6    | 550   | 156  | 4.4 | 12   | 580   | 166  | 4.2 | F    | 92    | 174  | 30.4 |

SW- saddle's weight [kg]; BW- bodyweight [kg]; height [cm]; BMI- body mass index [kg/m<sup>2</sup>].

**Table S2.** Details of the rider:horse bodyweight ratio of pairs participating in the study. Riders represented the light (L), moderate (M), and heavy (H) riders groups.

| Rider groups | Horse/<br>Rider | Rider: Horse Bodyweight Ratio |      |      |      |      |      |      |      |      |      |      |      |
|--------------|-----------------|-------------------------------|------|------|------|------|------|------|------|------|------|------|------|
|              |                 | 1                             | 2    | 3    | 4    | 5    | 6    | 7    | 8    | 9    | 10   | 11   | 12   |
| L            | A               | 10.6                          | 11.4 | 10.7 | 10.9 | 11.1 | 11.3 | 11.1 | 11.4 | 10.9 | 10.8 | 11.0 | 10.7 |
|              | B               | 11.0                          | 11.7 | 11.1 | 11.2 | 11.4 | 11.7 | 11.5 | 11.8 | 11.3 | 11.1 | 11.4 | 11.1 |
| M            | C               | 13.9                          | 14.8 | 14.0 | 14.2 | 14.5 | 14.8 | 14.5 | 14.9 | 14.3 | 14.0 | 14.4 | 14.0 |
|              | D               | 13.5                          | 14.5 | 13.7 | 13.8 | 14.1 | 14.4 | 14.1 | 14.5 | 13.9 | 13.7 | 14.0 | 13.7 |
| H            | E               | 16.3                          | 17.4 | 16.4 | 16.6 | 17.0 | 17.3 | 17.0 | 17.5 | 16.7 | 16.4 | 16.8 | 16.4 |
|              | F               | 16.4                          | 17.5 | 16.6 | 16.8 | 17.2 | 17.5 | 17.2 | 17.7 | 16.9 | 16.6 | 17.0 | 16.6 |

Horse - from 1 to 12; Rider - from A to F.

**Table S3.** The withers area (ROI 1). Values (mean  $\pm$  SD) of entropy measures for grayscale images in light (L), moderate (M), and heavy (H) groups. The pre-exercise (pre-ex) and post exercise (post-ex) data series were compared. When features differed significantly ( $p < 0.05$ ) for all three groups (L, M, H), the values were marked in bold.

| Groups |         | SampEn          | FuzzEn          | PermEn          | DispEn          | DistEn          |
|--------|---------|-----------------|-----------------|-----------------|-----------------|-----------------|
| L      | pre-ex  | 1.14 $\pm$ 0.39 | 1.77 $\pm$ 0.45 | 1.20 $\pm$ 0.04 | 7.01 $\pm$ 0.51 | 0.93 $\pm$ 0.06 |
|        | post-ex | 1.06 $\pm$ 0.25 | 1.63 $\pm$ 0.29 | 1.19 $\pm$ 0.04 | 7.00 $\pm$ 0.41 | 0.93 $\pm$ 0.04 |
|        | p       | 0.500           | 0.262           | 0.509           | 0.622           | 0.812           |
| M      | pre-ex  | 1.04 $\pm$ 0.41 | 1.71 $\pm$ 0.50 | 1.20 $\pm$ 0.03 | 7.08 $\pm$ 0.51 | 0.92 $\pm$ 0.05 |
|        | post-ex | 1.21 $\pm$ 0.38 | 1.83 $\pm$ 0.45 | 1.20 $\pm$ 0.04 | 7.18 $\pm$ 0.37 | 0.92 $\pm$ 0.03 |
|        | p       | 0.065           | 0.375           | 0.877           | 0.318           | > 0.999         |
| H      | pre-ex  | 1.20 $\pm$ 0.33 | 1.92 $\pm$ 0.43 | 1.21 $\pm$ 0.02 | 7.23 $\pm$ 0.36 | 0.93 $\pm$ 0.05 |
|        | post-ex | 1.22 $\pm$ 0.43 | 1.78 $\pm$ 0.49 | 1.21 $\pm$ 0.03 | 7.22 $\pm$ 0.45 | 0.94 $\pm$ 0.03 |
|        | p       | 0.822           | 0.170           | 0.375           | 0.923           | 0.855           |

ROI - regions of interest. SampEn - two-dimensional sample entropy, FuzzEn - two-dimensional fuzzy entropy, PermEn - two-dimensional permutation entropy, DispEn - two-dimensional dispersion entropy, DistEn - two-dimensional distribution entropy. p - the level of marginal significance; SD - standard deviation.

**Table S4.** The thoracic spine area (ROI 2). Values (mean  $\pm$  SD) of entropy measures for grayscale images in light (L), moderate (M), and heavy (H) groups. The pre-exercise (pre-ex) and post exercise (post-ex) data series were compared. When features differed significantly ( $p < 0.05$ ) for all three groups (L, M, H), the values were marked in bold.

| Groups |         | SampEn                          | FuzzEn                          | PermEn                          | DispEn          | DistEn                          |
|--------|---------|---------------------------------|---------------------------------|---------------------------------|-----------------|---------------------------------|
| L      | pre-ex  | <b>0.84<math>\pm</math>0.33</b> | <b>1.46<math>\pm</math>0.35</b> | <b>1.15<math>\pm</math>0.06</b> | 6.80 $\pm$ 0.54 | <b>0.95<math>\pm</math>0.04</b> |
|        | post-ex | <b>1.21<math>\pm</math>0.35</b> | <b>1.75<math>\pm</math>0.41</b> | <b>1.19<math>\pm</math>0.03</b> | 6.96 $\pm$ 0.43 | <b>0.93<math>\pm</math>0.04</b> |
|        | p       | <b>0.001</b>                    | <b>0.016</b>                    | <b>0.001</b>                    | 0.164           | <b>0.046</b>                    |
| M      | pre-ex  | <b>0.81<math>\pm</math>0.33</b> | <b>1.41<math>\pm</math>0.40</b> | 1.15 $\pm$ 0.05                 | 6.82 $\pm$ 0.47 | 0.94 $\pm$ 0.04                 |
|        | post-ex | <b>1.10<math>\pm</math>0.40</b> | <b>1.61<math>\pm</math>0.35</b> | 1.18 $\pm$ 0.05                 | 6.87 $\pm$ 0.57 | 0.93 $\pm$ 0.04                 |
|        | p       | <b>0.003</b>                    | <b>0.049</b>                    | 0.051                           | 0.944           | 0.114                           |
| H      | pre-ex  | 1.07 $\pm$ 0.48                 | 1.67 $\pm$ 0.41                 | 1.18 $\pm$ 0.04                 | 7.03 $\pm$ 0.43 | 0.92 $\pm$ 0.06                 |
|        | post-ex | 1.17 $\pm$ 0.47                 | 1.72 $\pm$ 0.51                 | 1.17 $\pm$ 0.08                 | 6.92 $\pm$ 0.93 | 0.90 $\pm$ 0.08                 |
|        | p       | 0.456                           | 0.838                           | 0.456                           | > 0.999         | 0.143                           |

ROI - regions of interest. SampEn - two-dimensional sample entropy, FuzzEn - two-dimensional fuzzy entropy, PermEn - two-dimensional permutation entropy, DispEn - two-dimensional dispersion entropy, DistEn - two-dimensional distribution entropy. p - the level of marginal significance; SD - standard deviation.

**Table S5.** The withers area (ROI 1). Values (mean  $\pm$  SD) of entropy measures for red color component in light (L), moderate (M), and heavy (H) groups. The pre-exercise (pre-ex) and post exercise (post-ex) data series were compared. When features differed significantly ( $p < 0.05$ ) for all three groups (L, M, H), the values were marked in bold.

| Groups |         | SampEn          | FuzzEn                          | PermEn                          | DispEn                          | DistEn                          |
|--------|---------|-----------------|---------------------------------|---------------------------------|---------------------------------|---------------------------------|
| L      | pre-ex  | 0.61 $\pm$ 0.35 | 1.38 $\pm$ 0.60                 | 1.17 $\pm$ 0.05                 | <b>7.25<math>\pm</math>0.39</b> | <b>0.83<math>\pm</math>0.15</b> |
|        | post-ex | 0.94 $\pm$ 0.74 | 1.15 $\pm$ 0.29                 | 1.19 $\pm$ 0.04                 | <b>6.57<math>\pm</math>0.47</b> | <b>0.50<math>\pm</math>0.14</b> |
|        | p       | 0.089           | 0.218                           | 0.345                           | <b>&lt; 0.0001</b>              | <b>&lt; 0.0001</b>              |
| M      | pre-ex  | 0.55 $\pm$ 0.31 | <b>1.34<math>\pm</math>0.58</b> | 1.17 $\pm$ 0.05                 | <b>7.34<math>\pm</math>0.42</b> | <b>0.85<math>\pm</math>0.14</b> |
|        | post-ex | 0.55 $\pm$ 0.42 | <b>0.99<math>\pm</math>0.24</b> | 1.19 $\pm$ 0.04                 | <b>6.87<math>\pm</math>0.68</b> | <b>0.59<math>\pm</math>0.21</b> |
|        | p       | 0.584           | <b>0.020</b>                    | 0.152                           | <b>0.005</b>                    | <b>&lt; 0.0001</b>              |
| H      | pre-ex  | 0.54 $\pm$ 0.27 | <b>1.39<math>\pm</math>0.50</b> | <b>1.15<math>\pm</math>0.04</b> | <b>7.45<math>\pm</math>0.35</b> | <b>0.90<math>\pm</math>0.09</b> |
|        | post-ex | 0.59 $\pm$ 0.31 | <b>1.14<math>\pm</math>0.27</b> | <b>1.22<math>\pm</math>0.08</b> | <b>7.11<math>\pm</math>0.55</b> | <b>0.64<math>\pm</math>0.23</b> |
|        | p       | 0.550           | <b>0.034</b>                    | <b>&lt; 0.0001</b>              | <b>0.007</b>                    | <b>&lt; 0.0001</b>              |

ROI - regions of interest. SampEn - two-dimensional sample entropy, FuzzEn - two-dimensional fuzzy entropy, PermEn - two-dimensional permutation entropy, DispEn - two-dimensional dispersion entropy, DistEn - two-dimensional distribution entropy. p - the level of marginal significance; SD - standard deviation.

**Table S6.** The thoracic spine area (ROI 2). Values (mean  $\pm$  SD) of entropy measures red color component in light (L), moderate (M), and heavy (H) groups. The pre-exercise (pre-ex) and post exercise (post-ex) data series were compared. When features differed significantly ( $p < 0.05$ ) for all three groups (L, M, H), the values were marked in bold.

| Groups |         | SampEn                          | FuzzEn                          | PermEn                          | DispEn                          | DistEn                          |
|--------|---------|---------------------------------|---------------------------------|---------------------------------|---------------------------------|---------------------------------|
| L      | pre-ex  | <b>0.82<math>\pm</math>0.83</b> | <b>0.91<math>\pm</math>0.37</b> | <b>1.13<math>\pm</math>0.06</b> | <b>6.05<math>\pm</math>0.69</b> | <b>0.81<math>\pm</math>0.14</b> |
|        | post-ex | <b>1.98<math>\pm</math>1.60</b> | <b>1.52<math>\pm</math>0.32</b> | <b>1.18<math>\pm</math>0.04</b> | <b>6.34<math>\pm</math>0.71</b> | <b>0.63<math>\pm</math>0.14</b> |
|        | p       | <b>0.001</b>                    | <b>&lt; 0.0001</b>              | <b>0.004</b>                    | <b>0.037</b>                    | <b>0.0001</b>                   |
| M      | pre-ex  | <b>0.61<math>\pm</math>0.69</b> | <b>0.84<math>\pm</math>0.36</b> | <b>1.13<math>\pm</math>0.06</b> | <b>6.18<math>\pm</math>0.60</b> | <b>0.82<math>\pm</math>0.14</b> |
|        | post-ex | <b>1.16<math>\pm</math>0.89</b> | <b>1.42<math>\pm</math>0.36</b> | <b>1.17<math>\pm</math>0.06</b> | <b>6.68<math>\pm</math>0.93</b> | <b>0.66<math>\pm</math>0.14</b> |
|        | p       | <b>0.001</b>                    | <b>&lt; 0.0001</b>              | <b>0.033</b>                    | <b>0.025</b>                    | <b>0.0001</b>                   |
| H      | pre-ex  | <b>0.56<math>\pm</math>0.67</b> | <b>0.86<math>\pm</math>0.30</b> | 1.15 $\pm$ 0.06                 | <b>6.36<math>\pm</math>0.76</b> | <b>0.87<math>\pm</math>0.12</b> |
|        | post-ex | <b>1.11<math>\pm</math>1.08</b> | <b>1.41<math>\pm</math>0.40</b> | 1.18 $\pm$ 0.05                 | <b>6.91<math>\pm</math>0.99</b> | <b>0.67<math>\pm</math>0.19</b> |
|        | p       | <b>0.003</b>                    | <b>&lt; 0.0001</b>              | 0.160                           | <b>0.018</b>                    | <b>0.002</b>                    |

ROI - regions of interest. SampEn - two-dimensional sample entropy, FuzzEn - two-dimensional fuzzy entropy, PermEn - two-dimensional permutation entropy, DispEn - two-dimensional dispersion entropy, DistEn - two-dimensional distribution entropy. p - the level of marginal significance; SD - standard deviation.

**Table S7.** The withers area (ROI 1). Values (mean  $\pm$  SD) of entropy measures for green color component in light (L), moderate (M), and heavy (H) groups. The pre-exercise (pre-ex) and post exercise (post-ex) data series were compared. When features differed significantly ( $p < 0.05$ ) for all three groups (L, M, H), the values were marked in bold.

| Groups |         | SampEn                          | FuzzEn          | PermEn                          | DispEn                          | DistEn                          |
|--------|---------|---------------------------------|-----------------|---------------------------------|---------------------------------|---------------------------------|
| L      | pre-ex  | <b>1.13<math>\pm</math>0.49</b> | 2.22 $\pm$ 0.61 | <b>1.16<math>\pm</math>0.04</b> | <b>7.45<math>\pm</math>0.26</b> | <b>0.88<math>\pm</math>0.07</b> |
|        | post-ex | <b>0.89<math>\pm</math>0.29</b> | 1.96 $\pm$ 0.45 | <b>1.14<math>\pm</math>0.03</b> | <b>7.71<math>\pm</math>0.25</b> | <b>0.98<math>\pm</math>0.02</b> |
|        | p       | <b>0.038</b>                    | 0.106           | <b>0.025</b>                    | <b>0.0002</b>                   | <b>&lt; 0.0001</b>              |
| M      | pre-ex  | <b>1.05<math>\pm</math>0.32</b> | 2.16 $\pm$ 0.46 | <b>1.17<math>\pm</math>0.04</b> | <b>7.52<math>\pm</math>0.25</b> | <b>0.88<math>\pm</math>0.08</b> |
|        | post-ex | <b>0.82<math>\pm</math>0.25</b> | 1.96 $\pm$ 0.47 | <b>1.15<math>\pm</math>0.03</b> | <b>7.74<math>\pm</math>0.19</b> | <b>0.97<math>\pm</math>0.02</b> |
|        | p       | <b>0.004</b>                    | 0.065           | <b>0.039</b>                    | <b>0.0004</b>                   | <b>&lt; 0.0001</b>              |
| H      | pre-ex  | 1.06 $\pm$ 0.43                 | 2.13 $\pm$ 0.59 | <b>1.17<math>\pm</math>0.04</b> | <b>7.48<math>\pm</math>0.27</b> | <b>0.85<math>\pm</math>0.06</b> |
|        | post-ex | 0.93 $\pm$ 0.34                 | 2.06 $\pm$ 0.54 | <b>1.14<math>\pm</math>0.02</b> | <b>7.76<math>\pm</math>0.33</b> | <b>0.97<math>\pm</math>0.03</b> |
|        | p       | 0.240                           | 0.650           | <b>0.0008</b>                   | <b>0.003</b>                    | <b>&lt; 0.0001</b>              |

ROI - regions of interest. SampEn - two-dimensional sample entropy, FuzzEn - two-dimensional fuzzy entropy, PermEn - two-dimensional permutation entropy, DispEn - two-dimensional dispersion entropy, DistEn - two-dimensional distribution entropy. p - the level of marginal significance; SD - standard deviation.

**Table S8.** The thoracic spine area (ROI 2). Values (mean  $\pm$  SD) of entropy measures green color component in light (L), moderate (M), and heavy (H) groups. The pre-exercise (pre-ex) and post exercise (post-ex) data series were compared. When features differed significantly ( $p < 0.05$ ) for all three groups (L, M, H), the values were marked in bold.

| Groups |         | SampEn                          | FuzzEn                          | PermEn          | DispEn                          | DistEn                          |
|--------|---------|---------------------------------|---------------------------------|-----------------|---------------------------------|---------------------------------|
| L      | pre-ex  | <b>0.73<math>\pm</math>0.32</b> | <b>1.79<math>\pm</math>0.54</b> | 1.12 $\pm$ 0.04 | <b>7.28<math>\pm</math>0.46</b> | <b>0.92<math>\pm</math>0.05</b> |
|        | post-ex | <b>1.45<math>\pm</math>0.41</b> | <b>2.86<math>\pm</math>0.61</b> | 1.10 $\pm$ 0.04 | <b>7.69<math>\pm</math>0.22</b> | <b>0.85<math>\pm</math>0.07</b> |
|        | p       | <b>&lt; 0.0001</b>              | <b>&lt; 0.0001</b>              | 0.088           | <b>0.0007</b>                   | <b>0.0004</b>                   |
| M      | pre-ex  | <b>0.76<math>\pm</math>0.35</b> | <b>1.84<math>\pm</math>0.68</b> | 1.13 $\pm$ 0.04 | <b>7.38<math>\pm</math>0.39</b> | <b>0.95<math>\pm</math>0.05</b> |
|        | post-ex | <b>1.07<math>\pm</math>0.41</b> | <b>2.23<math>\pm</math>0.63</b> | 1.13 $\pm$ 0.05 | <b>7.70<math>\pm</math>0.34</b> | <b>0.89<math>\pm</math>0.07</b> |
|        | p       | <b>0.008</b>                    | <b>0.044</b>                    | 0.793           | <b>0.004</b>                    | <b>0.004</b>                    |
| H      | pre-ex  | 0.91 $\pm$ 0.45                 | 2.07 $\pm$ 0.62                 | 1.12 $\pm$ 0.05 | <b>7.10<math>\pm</math>0.53</b> | <b>0.97<math>\pm</math>0.03</b> |
|        | post-ex | 1.12 $\pm$ 0.63                 | 2.27 $\pm$ 0.99                 | 1.13 $\pm$ 0.04 | <b>7.71<math>\pm</math>0.53</b> | <b>0.92<math>\pm</math>0.06</b> |
|        | p       | 0.303                           | 0.812                           | 0.353           | <b>0.0002</b>                   | <b>0.0002</b>                   |

ROI - regions of interest. SampEn - two-dimensional sample entropy, FuzzEn - two-dimensional fuzzy entropy, PermEn - two-dimensional permutation entropy, DispEn - two-dimensional dispersion entropy, DistEn - two-dimensional distribution entropy. p - the level of marginal significance; SD - standard deviation.

**Table S9.** The withers area (ROI 1). Values (mean  $\pm$  SD) of entropy measures for blue color component in light (L), moderate (M), and heavy (H) groups. The pre-exercise (pre-ex) and post exercise (post-ex) data series were compared. When features differed significantly ( $p < 0.05$ ) for all three groups (L, M, H), the values were marked in bold.

| Groups |         | SampEn                          | FuzzEn                          | PermEn                          | DispEn                          | DistEn                          |
|--------|---------|---------------------------------|---------------------------------|---------------------------------|---------------------------------|---------------------------------|
| L      | pre-ex  | <b>1.09<math>\pm</math>0.71</b> | <b>1.71<math>\pm</math>0.51</b> | 1.19 $\pm$ 0.03                 | <b>7.77<math>\pm</math>0.22</b> | <b>0.86<math>\pm</math>0.09</b> |
|        | post-ex | <b>1.54<math>\pm</math>0.45</b> | <b>2.41<math>\pm</math>0.43</b> | 1.18 $\pm$ 0.02                 | <b>7.02<math>\pm</math>0.26</b> | <b>0.72<math>\pm</math>0.11</b> |
|        | p       | <b>0.013</b>                    | <b>&lt; 0.0001</b>              | 0.050                           | <b>&lt; 0.0001</b>              | <b>0.021</b>                    |
| M      | pre-ex  | <b>0.83<math>\pm</math>0.40</b> | <b>1.51<math>\pm</math>0.41</b> | <b>1.20<math>\pm</math>0.02</b> | <b>7.65<math>\pm</math>0.28</b> | <b>0.87<math>\pm</math>0.08</b> |
|        | post-ex | <b>1.17<math>\pm</math>0.41</b> | <b>2.04<math>\pm</math>0.45</b> | <b>1.18<math>\pm</math>0.02</b> | <b>7.21<math>\pm</math>0.35</b> | <b>0.80<math>\pm</math>0.11</b> |
|        | p       | <b>0.007</b>                    | <b>&lt; 0.0001</b>              | <b>0.045</b>                    | <b>&lt; 0.0001</b>              | <b>&lt; 0.0001</b>              |
| H      | pre-ex  | <b>0.70<math>\pm</math>0.31</b> | <b>1.43<math>\pm</math>0.30</b> | 1.19 $\pm$ 0.03                 | <b>7.65<math>\pm</math>0.33</b> | <b>0.89<math>\pm</math>0.09</b> |
|        | post-ex | <b>1.10<math>\pm</math>0.35</b> | <b>1.96<math>\pm</math>0.40</b> | 1.19 $\pm$ 0.02                 | <b>7.37<math>\pm</math>0.35</b> | <b>0.84<math>\pm</math>0.09</b> |
|        | p       | <b>0.0003</b>                   | <b>&lt; 0.0001</b>              | 0.288                           | <b>0.010</b>                    | <b>0.032</b>                    |

ROI - regions of interest. SampEn - two-dimensional sample entropy, FuzzEn - two-dimensional fuzzy entropy, PermEn - two-dimensional permutation entropy, DispEn - two-dimensional dispersion entropy, DistEn - two-dimensional distribution entropy. p - the level of marginal significance; SD - standard deviation.

**Table S10.** The thoracic spine area (ROI 2). Values (mean  $\pm$  SD) of entropy measures blue color component in light (L), moderate (M), and heavy (H) groups. The pre-exercise (pre-ex) and post exercise (post-ex) data series were compared. When features differed significantly ( $p < 0.05$ ) for all three groups (L, M, H), the values were marked in bold.

| Groups |         | SampEn                          | FuzzEn                          | PermEn          | DispEn                          | DistEn                          |
|--------|---------|---------------------------------|---------------------------------|-----------------|---------------------------------|---------------------------------|
| L      | pre-ex  | <b>1.33<math>\pm</math>0.52</b> | <b>2.08<math>\pm</math>0.44</b> | 1.18 $\pm$ 0.04 | <b>7.89<math>\pm</math>0.20</b> | <b>0.84<math>\pm</math>0.09</b> |
|        | post-ex | <b>1.78<math>\pm</math>0.49</b> | <b>2.34<math>\pm</math>0.49</b> | 1.19 $\pm$ 0.02 | <b>7.45<math>\pm</math>0.30</b> | <b>0.71<math>\pm</math>0.11</b> |
|        | p       | <b>&lt; 0.0001</b>              | <b>0.004</b>                    | 0.327           | <b>&lt; 0.0001</b>              | <b>&lt; 0.0001</b>              |
| M      | pre-ex  | 1.18 $\pm$ 0.46                 | 1.97 $\pm$ 0.41                 | 1.19 $\pm$ 0.02 | <b>7.82<math>\pm</math>0.13</b> | <b>0.86<math>\pm</math>0.07</b> |
|        | post-ex | 1.39 $\pm$ 0.49                 | 2.04 $\pm$ 0.46                 | 1.19 $\pm$ 0.04 | <b>7.57<math>\pm</math>0.26</b> | <b>0.77<math>\pm</math>0.11</b> |
|        | p       | 0.128                           | 0.527                           | 0.812           | <b>0.0001</b>                   | <b>0.0008</b>                   |
| H      | pre-ex  | 1.26 $\pm$ 0.50                 | 2.03 $\pm$ 0.46                 | 1.19 $\pm$ 0.03 | <b>7.84<math>\pm</math>0.12</b> | <b>0.85<math>\pm</math>0.08</b> |
|        | post-ex | 1.38 $\pm$ 0.80                 | 1.97 $\pm$ 0.65                 | 1.19 $\pm$ 0.02 | <b>7.66<math>\pm</math>0.27</b> | <b>0.81<math>\pm</math>0.07</b> |
|        | p       | 0.790                           | 0.591                           | 0.931           | <b>0.016</b>                    | <b>0.026</b>                    |

ROI - regions of interest. SampEn - two-dimensional sample entropy, FuzzEn - two-dimensional fuzzy entropy, PermEn - two-dimensional permutation entropy, DispEn - two-dimensional dispersion entropy, DistEn - two-dimensional distribution entropy. p - the level of marginal significance; SD - standard deviation.
